# Supplementary material
Source: HighWire-hosted journal article supplement (http://molpharm.aspetjournals.org/highwire/filestream/76513/field_highwire_adjunct_files/0/Supplemental_Information1.pdf)
Supplement: Supplemental_Information1.pdf [file Supplemental_Information1.pdf]

## **Supplemental Material**

**for**

### **High-throughput Screening for Small-molecule Activators of Neutrophils: Identification of Novel *N*-Formyl Peptide Receptor Agonists**

**Igor A. Schepetkin,<sup>a</sup> Liliya N. Kirpotina,<sup>a</sup> Andrei I. Khlebnikov,<sup>b</sup> and Mark T. Quinn<sup>a</sup>**

*<sup>a</sup>Department of Veterinary Molecular Biology*

*Montana State University, Bozeman, MT 59717, USA*

*<sup>b</sup>Department of Chemistry*

*Altai State Technical University, Barnaul 656038, Russia*

**Figure S1. Comparison of Test Compound Activity in Murine Bone Marrow Leukocytes Versus Isolated Murine Neutrophils**

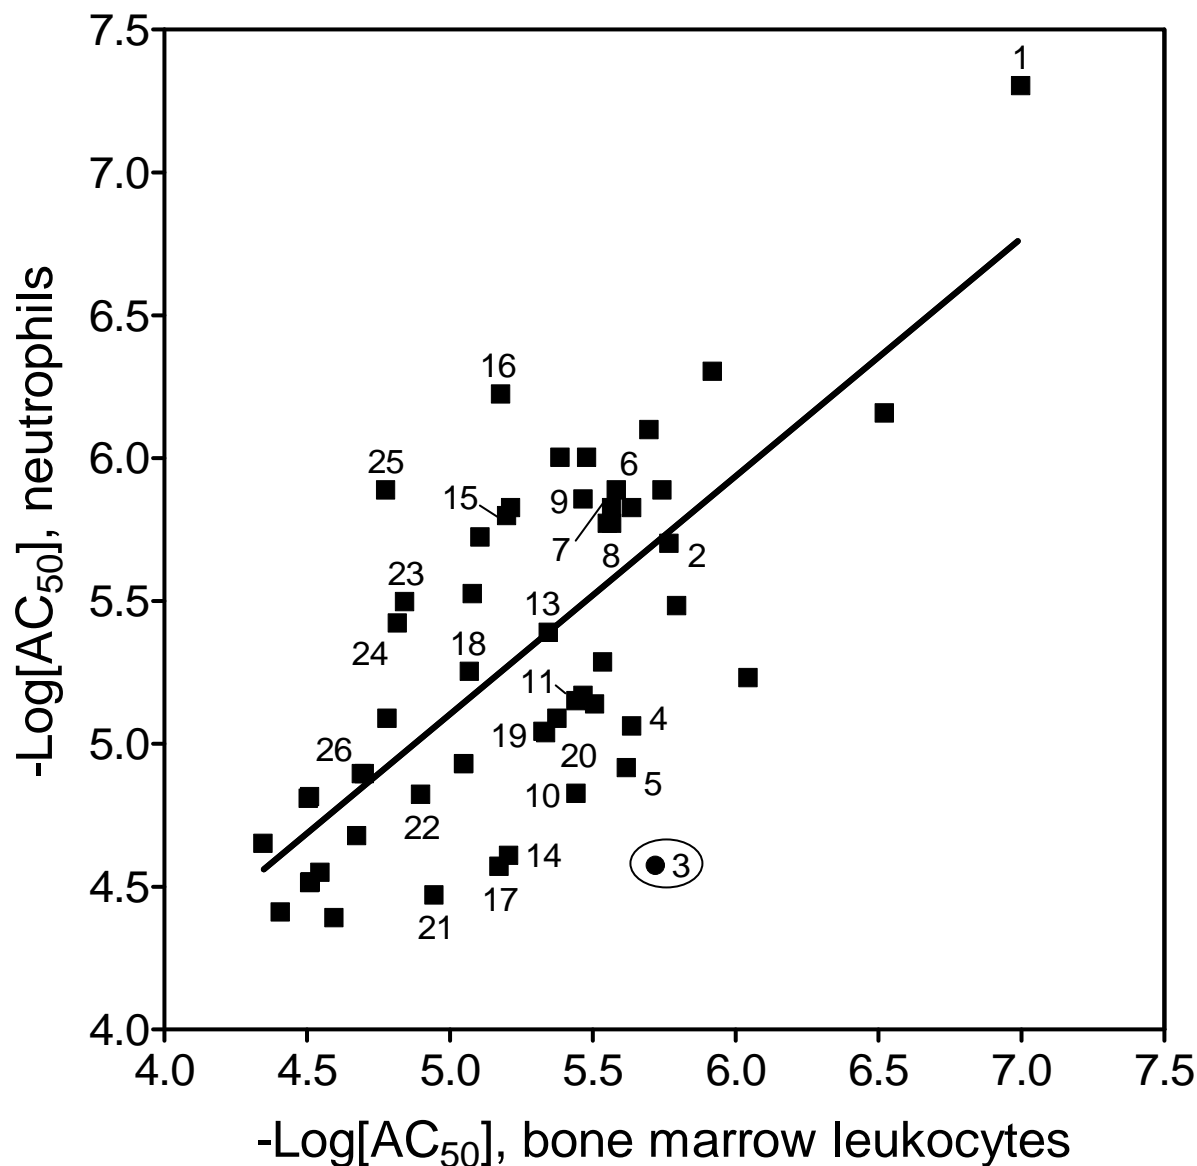

Cells were treated with a range of test compounds, and ROS production was measured to determine AC<sub>50</sub> values for each of the 56 hit compounds in murine bone marrow leukocytes and purified murine neutrophils. A line indicating the best-fit linear regression is shown (excluding the outlier point for compound 3). Compound numbers are shown for the 26 lead compounds selected for further analysis.

**Figure S2. Representative Example of Human Neutrophil Chemotactic Response to a Test Compound**

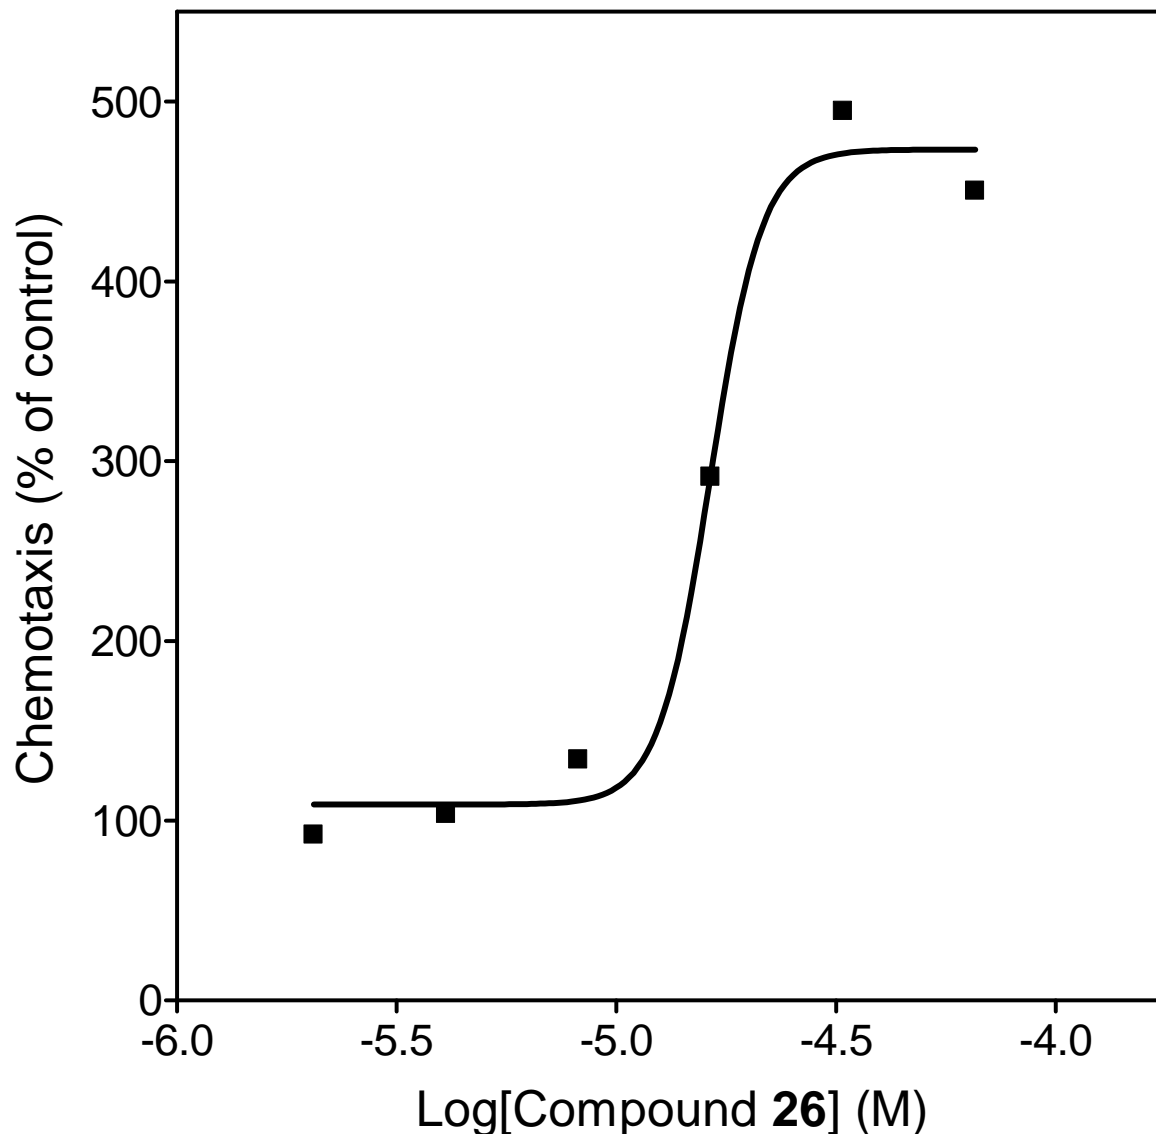

Human neutrophil chemotaxis towards the indicated concentrations of compound **26** was determined, as described under Materials and Methods. Note that higher concentrations of test compounds resulted in inhibition of chemotaxis. However, we did not include these data points due to potential for non-specific effects and issues of compound solubility. A representative experiment from three independent experiments is shown.

**Table S1. Synthetic and Natural Small-molecule Compounds Previously Reported to Activate Phagocytes.**

| Compound name (drug class)               | Structure | Mechanism and/or stimulation effect (cell type)                             | Ref.    | Compound name (drug class)                     | Structure | Mechanism and/or stimulation effect (cell type)                                | Ref.    |
|------------------------------------------|-----------|-----------------------------------------------------------------------------|---------|------------------------------------------------|-----------|--------------------------------------------------------------------------------|---------|
| Amorolfin (antimycotic drug)             |           | Phagocytosis (human PMN)                                                    | (26)    | Kazinol B (plant derived COX-2 inhibitor)      |           | PTX-insensitive, $\uparrow[\text{Ca}^{2+}]_i$ , PKC & ROS production (rat PMN) | (34,35) |
| Anisomycin (antibiotic)                  |           | $\uparrow$ p38 MAP kinase, degranulation (human PMN)                        | (13)    | m-3M3FBS (nonspecific activator of PLC)        |           | $\uparrow$ PLC, ROS production (human PMN)                                     | (1,15)  |
| Artocarpol A (natural phenolic compound) |           | $\uparrow$ PI3K, PLC & PKC, ROS production (rat PMN)                        | (16,17) | MK-886 (inhibitor of 5-LPO activating protein) |           | ROS production (human PMN)                                                     | (11)    |
| Azimexon (synthetic immunoadjuvant)      |           | ROS production (murine PMN)                                                 | (27)    | No name (agonist of C5a receptor)              |           | IP <sub>3</sub> production (COS 7 <sup>a</sup> )                               | (4)     |
| Benoxaprofen (mixed COX/5-LPO inhibitor) |           | $\uparrow$ PKC, ROS production (human PMN)                                  | (32)    | Norfloxacin (antibiotic)                       |           | $\uparrow$ p47-phox translocation, ROS production (murine M $\phi$ )           | (6)     |
| Bestatin (inhibitor of aminopeptidase N) |           | Phagocytosis (human PMN)                                                    | (20)    | Pyriothioxine (neurotropic agent)              |           | $\uparrow$ [cGMP], chemotaxis (rabbit PMN)                                     | (8)     |
| Cannabidiol (plant-derived cannabinoid)  |           | ROS production (human PMN)                                                  | (22)    | Pidotimod (synthetic immunoadjuvant)           |           | Phagocytosis. (human PMN)                                                      | (24)    |
| Captopril (inhibitor of ACE)             |           | G protein-dependent, $\uparrow$ [cGMP] & degranulation (rabbit & human PMN) | (7,28)  | Pro-Pro dipeptide (natural dipeptide)          |           | $\uparrow$ tyrosine kinase, priming of ROS production (human PMN)              | (29,36) |

|                                                  |                                                                                     |                                                                                                       |         |                                                      |                                                                                       |                                                                                 |        |
|--------------------------------------------------|-------------------------------------------------------------------------------------|-------------------------------------------------------------------------------------------------------|---------|------------------------------------------------------|---------------------------------------------------------------------------------------|---------------------------------------------------------------------------------|--------|
| Cefodizime<br>(antibiotic)                       | 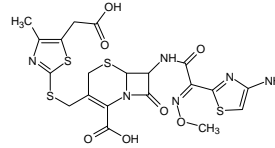   | Phagocytosis &<br>ROS production<br>(human PMN)                                                       | (3,25)  | SB 290157 (agonist<br>of C3a receptor)               |    | [Ca <sup>2+</sup> ] <sub>i</sub> (RBL cells <sup>b</sup> )                      | (19)   |
| Celecoxib<br>(selective COX-2<br>inhibitor)      |    | G-protein-<br>dependent, ↑[Ca <sup>2+</sup> ] <sub>i</sub><br>& PKC, ROS<br>production (human<br>PMN) | (5)     | Terbinafine (inhibitor<br>of squalene<br>epoxidase)  |    | ↑[Ca <sup>2+</sup> ] <sub>i</sub> , priming of<br>ROS production<br>(human PMN) | (2,31) |
| CL 246,738<br>(synthetic<br>immunoajuvant)       |    | Cytostatic activity<br>(murine Mφ)                                                                    | (33)    | Terbutaline (β <sub>2</sub> -<br>receptor agonist)   |    | ROS production &<br>chemotaxis<br>(human PMN)                                   | (18)   |
| Clofazimine<br>(antibiotic)                      |    | ↑PLA <sub>2</sub> , priming of<br>ROS production<br>(human PMN)                                       | (14,37) | Thymol (plant-<br>derived antimicrobial<br>agent)    |    | ROS production<br>(guinea pig PMN)                                              | (30)   |
| Enalaprilat<br>(inhibitor of ACE)                |    | Degranulation<br>(human PMN)                                                                          | (21)    | Tiprotimod [HBW<br>538] (synthetic<br>immunoajuvant) |    | ROS production<br>(human PMN)                                                   | (25)   |
| Imiquimod<br>(synthetic<br>immunoajuvant)        |   | Production of IFN-α,<br>IL-12 & TNF-α<br>(human PMN)                                                  | (10,12) | Tuftsins (natural IgG-<br>derived peptide)           |   | Phagocytosis<br>(human PMN)                                                     | (28)   |
| Indomethacin<br>(non-selective<br>COX inhibitor) |  | ↑[Ca <sup>2+</sup> ] <sub>i</sub> & PKC,<br>ROS & MPO release<br>(human PMN)                          | (9)     | Quin-C1 (FPRL1<br>agonist)                           |  | ↑chemotaxis and<br>degranulation<br>(human PMN)                                 | (23)   |

PMN, polymorphonuclear leukocytes; Mφ, macrophages; ACE, angiotensin converting enzyme; COX, cyclooxygenase; LPO, lipoxygenase; PLC, phospholipase C. <sup>a</sup>Assays were performed on COS-7 cells transfected with the C5a receptor. <sup>b</sup>Assays were performed on RBL cells transfected with the C3a receptor. References (Ref.) are listed below in this Supplement.

**Table S2. Effect of t-Butyl-benzene Derivatives (n=42) on ROS Production in Bone Marrow Leukocytes and Isolated Murine and Human Neutrophils.**

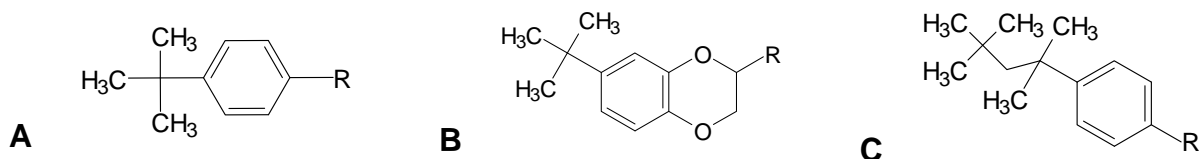

| N  | Fragment Type and Structure of R |                                                                                     | AC <sub>50</sub> (μM) |      |      | N  | Fragment Type and Structure of R |                                                                                       | AC <sub>50</sub> (μM) |     |    |
|----|----------------------------------|-------------------------------------------------------------------------------------|-----------------------|------|------|----|----------------------------------|---------------------------------------------------------------------------------------|-----------------------|-----|----|
|    |                                  |                                                                                     | BM                    | PMN  |      |    |                                  |                                                                                       | BM                    | PMN |    |
|    |                                  |                                                                                     |                       | M    | H    |    |                                  |                                                                                       |                       | M   | H  |
| 2  | A                                | 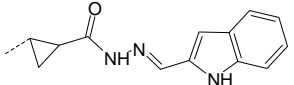   | 1.7                   | 2.0  | 4.9  | 42 | A                                |    | NA                    | NA  | NA |
| 19 | A                                |    | 8.6                   | 12.0 | 17.3 | 43 | A                                |    | NA                    | NA  | NA |
| 20 | B                                |    | 8.9                   | 11.8 | NA   | 44 | A                                |    | NA                    | NA  | NA |
| 21 | C                                |   | 11.3                  | 34.0 | NA   | 45 | A                                |   | NA                    | NA  | NA |
| 23 | A                                |  | 14.3                  | 3.2  | 3.2  | 46 | A                                |   | NA                    | NA  | NA |
| 25 | A                                |  | 16.7                  | 1.3  | NA   | 47 | A                                |   | NA                    | NA  | NA |
| 27 | A                                |  | 21.1                  | 21.1 | 10.6 | 48 | A                                |  | NA                    | NA  | NA |
| 28 | A                                |  | 24.0                  | 12.1 | NA   | 49 | A                                |   | NA                    | NA  | NA |
| 29 | B                                |  | 27.0                  | 6.7  | NA   | 50 | A                                |  | NA                    | NA  | NA |
| 30 | A                                |  | 29.3                  | 15.6 | NA   | 51 | A                                |  | NA                    | NA  | NA |

|    |   |  |      |      |      |    |   |  |    |    |    |
|----|---|--|------|------|------|----|---|--|----|----|----|
| 31 | A |  | 31.0 | 30.8 | NA   | 52 | A |  | NA | NA | NA |
| 32 | A |  | 39.0 | 39.0 | NA   | 53 | A |  | NA | NA | NA |
| 33 | A |  | NA   | 13.3 | 13.3 | 54 | B |  | NA | NA | NA |
| 34 | A |  | NA   | 13.7 | NA   | 55 | B |  | NA | NA | NA |
| 35 | A |  | NA   | 13.8 | NA   | 56 | A |  | NA | NA | NA |
| 36 | A |  | NA   | 14.9 | NA   | 57 | A |  | NA | NA | NA |
| 37 | A |  | NA   | NA   | 6.4  | 58 | A |  | NA | NA | NA |
| 38 | A |  | NA   | NA   | NA   | 59 | A |  | NA | NA | NA |
| 39 | A |  | NA   | NA   | NA   | 60 | A |  | NA | NA | NA |
| 40 | A |  | NA   | NA   | NA   | 61 | A |  | NA | NA | NA |
| 41 | A |  | NA   | NA   | NA   | 62 | A |  | NA | NA | NA |

Compound activation of ROS production is indicated for bone marrow leukocytes (**BM**), murine neutrophils (**M PMN**), and human neutrophils (**H PMN**). **NA** indicates cell activation was <50% of control level over a concentration range of 0-40  $\mu$ M.

**Table S3. Effect of Thiophene-2-amide-3-carboxylic Ester Derivatives (n=47) on ROS Production in Bone Marrow Leukocytes and Isolated Murine Neutrophils.**

**A**

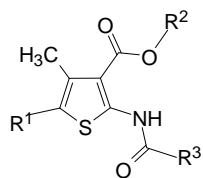

| N  | R <sup>1</sup>  | R <sup>2</sup>                  | R <sup>3</sup>  | AC <sub>50</sub> (μM) |     | N  | R <sup>1</sup>  | R <sup>2</sup>                  | R <sup>3</sup> | AC <sub>50</sub> (μM) |     |
|----|-----------------|---------------------------------|-----------------|-----------------------|-----|----|-----------------|---------------------------------|----------------|-----------------------|-----|
|    |                 |                                 |                 | BM                    | PMN |    |                 |                                 |                | BM                    | PMN |
| 6  | CH <sub>3</sub> | CH <sub>2</sub> CH <sub>3</sub> |                 | 2.6                   | 1.3 | 70 |                 | CH <sub>2</sub> CH <sub>3</sub> |                | 3.7                   | NA  |
| 7  | CH <sub>3</sub> | CH <sub>2</sub> CH <sub>3</sub> |                 | 2.7                   | 1.7 | 71 | CH <sub>3</sub> | CH <sub>2</sub> CH <sub>3</sub> |                | NA                    | NA  |
| 8  | CH <sub>3</sub> | CH <sub>2</sub> CH <sub>3</sub> |                 | 2.8                   | 1.7 | 72 | CH <sub>3</sub> | CH <sub>2</sub> CH <sub>3</sub> |                | NA                    | NA  |
| 63 | CH <sub>3</sub> | CH <sub>3</sub>                 |                 | 1.3                   | 2.1 | 73 | CH <sub>3</sub> | CH <sub>2</sub> CH <sub>3</sub> |                | NA                    | NA  |
| 64 | CH <sub>3</sub> | CH <sub>2</sub> CH <sub>3</sub> |                 | 1.4                   | 1.2 | 74 |                 | CH <sub>3</sub>                 |                | NA                    | NA  |
| 65 |                 | CH <sub>3</sub>                 | CH <sub>3</sub> | 1.7                   | NA  | 75 |                 | CH <sub>2</sub> CH <sub>3</sub> |                | NA                    | NA  |



|    |                 |                                 |                                  |     |     |    |  |                                 |  |    |    |
|----|-----------------|---------------------------------|----------------------------------|-----|-----|----|--|---------------------------------|--|----|----|
| 66 |                 | CH <sub>2</sub> CH <sub>3</sub> |                                  | 1.8 | 1.5 | 76 |  | CH <sub>2</sub> CH <sub>3</sub> |  | NA | NA |
| 67 |                 | CH <sub>3</sub>                 | CH <sub>2</sub> -CH <sub>3</sub> | 7.6 | 2.6 | 77 |  | CH <sub>2</sub> CH <sub>3</sub> |  | NA | NA |
| 68 | CH <sub>3</sub> | CH <sub>2</sub> CH <sub>3</sub> |                                  | 2.7 | NA  | 78 |  | CH <sub>2</sub> CH <sub>3</sub> |  | NA | NA |
| 69 |                 | CH <sub>2</sub> CH <sub>3</sub> |                                  | 5.1 | NA  | 79 |  | CH <sub>2</sub> CH <sub>3</sub> |  | NA | NA |

**B**

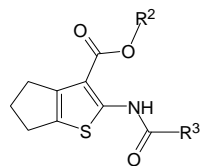

| N  | R <sup>2</sup>                  | R <sup>3</sup> | AC <sub>50</sub> (μM) |     | N  | R <sup>2</sup>                  | R <sup>3</sup> | AC <sub>50</sub> (μM) |     |
|----|---------------------------------|----------------|-----------------------|-----|----|---------------------------------|----------------|-----------------------|-----|
|    |                                 |                | BM                    | PMN |    |                                 |                | BM                    | PMN |
| 80 | CH <sub>2</sub> CH <sub>3</sub> |                | 2.9                   | NA  | 84 | CH <sub>2</sub> CH <sub>3</sub> |                | NA                    | NA  |
| 81 | CH <sub>3</sub>                 |                | 3.6                   | NA  | 85 | CH <sub>2</sub> CH <sub>3</sub> |                | NA                    | NA  |
| 82 | CH <sub>3</sub>                 |                | 4.3                   | NA  | 86 | CH <sub>2</sub> CH <sub>3</sub> |                | NA                    | NA  |
| 83 | CH <sub>3</sub>                 |                | NA                    | NA  |    |                                 |                |                       |     |

C

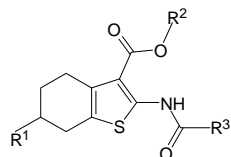

| N  | R <sup>1</sup>  | R <sup>2</sup>                  | R <sup>3</sup> | AC <sub>50</sub> (μM) |     | N  | R <sup>1</sup>                  | R <sup>2</sup>                  | R <sup>3</sup> | AC <sub>50</sub> (μM) |     |
|----|-----------------|---------------------------------|----------------|-----------------------|-----|----|---------------------------------|---------------------------------|----------------|-----------------------|-----|
|    |                 |                                 |                | BM                    | PMN |    |                                 |                                 |                | BM                    | PMN |
| 15 | H               |                                 |                | 6.3                   | 1.6 | 91 | H                               | CH <sub>3</sub>                 |                | 7.2                   | 1.6 |
|    |                 |                                 |                |                       |     | 92 | CH <sub>3</sub>                 | CH <sub>2</sub> CH <sub>3</sub> |                | 3.7                   | NA  |
| 16 | t-butyl         | CH <sub>2</sub> CH <sub>3</sub> |                | 6.6                   | 0.6 | 93 | CH <sub>2</sub> CH <sub>3</sub> | CH <sub>2</sub> CH <sub>3</sub> |                | 5.1                   | NA  |
| 87 | t-butyl         | CH <sub>2</sub> CH <sub>3</sub> |                | 2.6                   | 1.3 | 94 | H                               | CH <sub>3</sub>                 |                | NA                    | NA  |
| 88 | CH <sub>3</sub> | CH <sub>3</sub>                 |                | 0.1                   | 2.3 | 95 | CH <sub>3</sub>                 |                                 |                | NA                    | NA  |
| 89 | H               | CH <sub>2</sub> CH <sub>3</sub> |                | 17.6                  | NA  | 96 | H                               | CH <sub>2</sub> CH <sub>3</sub> |                | NA                    | NA  |
| 90 | H               | CH <sub>2</sub> CH <sub>3</sub> |                | 3.8                   | 2.7 | 97 | t-butyl                         | CH <sub>2</sub> CH <sub>3</sub> |                | NA                    | NA  |

D

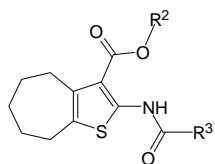

| N | R <sup>2</sup>                  | R <sup>3</sup> | AC <sub>50</sub> (μM) |      | N  | R <sup>2</sup>                  | R <sup>3</sup> | AC <sub>50</sub> (μM) |     |
|---|---------------------------------|----------------|-----------------------|------|----|---------------------------------|----------------|-----------------------|-----|
|   |                                 |                | BM                    | PMN  |    |                                 |                | BM                    | PMN |
| 1 | CH <sub>2</sub> CH <sub>3</sub> |                | 0.1                   | 0.05 | 98 | CH <sub>2</sub> CH <sub>3</sub> |                | 0.6                   | 3.4 |

| N   | Structure | AC <sub>50</sub> (μM) |     | N   | Structure | AC <sub>50</sub> (μM) |     |
|-----|-----------|-----------------------|-----|-----|-----------|-----------------------|-----|
|     |           | BM                    | PMN |     |           | BM                    | PMN |
| 99  |           | 2.7                   | 2.5 | 102 |           | NA                    | NA  |
| 100 |           | 1.3                   | NA  | 103 |           | NA                    | NA  |
| 101 |           | NA                    | NA  |     |           | NA                    | NA  |

Compound activation of ROS production is indicated for bone marrow leukocytes (**BM**) and murine neutrophils (**PMN**). **NA** indicates cell activation was <50% of control level over a concentration range of 0-20 μM.

## References for the Table S1

1. Bae YS, Lee TG, Park JC, Hur JH, Kim Y, Heo K, Kwak JY, Suh PG and Ryu SH (2003) Identification of a Compound That Directly Stimulates Phospholipase C Activity. *Mol Pharmacol* **63**:1043-1050.
2. Barbareschi M, Vago T, Colombo D, and Bevilacqua M (1993) Terbinafine induces the PMNL priming effect and enhances in vitro PMNL fungicidal activity against *Candida albicans* blastospores. *Mycoses* **36**:405-409.
3. Bialasiewicz P, Stolarek R, Wejner P, Piasecka G, Dutkiewicz B, Mikucki J, and Nowak D (2000) Cefodizime enhances phagocytosis and intracellular killing of *Staphylococcus aureus* but does not influence polymorphonuclear leukocytes response to fMLP stimulation. *Int J Immunopharmacol* **22**:557-566.
4. Buck E and Wells JA (2005) Disulfide Trapping to Localize Small-Molecule Agonists and Antagonists for a G Protein-Coupled Receptor. *Proc Natl Acad Sci U S A* **102**:2719-2724.
5. Chang-Hui L, Yen-Ju H, and Yin-Chou L (2004) Celecoxib simulates respiratory burst through pertussis toxin-sensitive G-protein, a possible signal for beta 2-integrin expression on human neutrophils. *Eur J Pharmacol* **484**:29-39.
6. El Bekay R, Alvarez M, Carballo M, Martin-Nieto J, Monteseirin J, Pintado E, Bedoya FJ, and Sobrino F (2002) Activation of phagocytic cell NADPH oxidase by norfloxacin: a potential mechanism to explain its bactericidal action. *J Leukoc Biol* **71**:255-261.
7. Elferink JG (1993) Captopril-induced enhancement of fMet-Leu-Phe-activated enzyme secretion from neutrophils. *Agents Actions* **38**:C136-138.
8. Elferink JG, and de Koster BM (1993) Differential stimulation of neutrophil functions by pyriethoxine. *Int J Immunopharm* **15**:641-646.
9. Fiorucci S, Santucci L, Gerli R, Brunori PM, Federici B, Ugolini B, Fabbri C, and Morelli A (1997) NSAIDs upregulate beta 2-integrin expression on human neutrophils through a calcium-dependent pathway. *Aliment Pharmacol Ther* **11**:619-630.
10. Gerster JF, Lindstrom KJ, Miller RL, Tomai MA, Birmachu W, Bomersine SN, Gibson SJ, Imbertson LM, Jacobson JR, Knafla RT, Maye PV, Nikolaidis N, Oneyemi FY, Parkhurst GJ, Pecore SE, Reiter MJ, Scribner LS, Testerman TL, Thompson NJ, Wagner TL, Weeks CE, Andre JD, Lagain D, Bastard Y, and Lupu M (2005) Synthesis and structure-activity-relationships of 1H-imidazo[4,5-c]quinolines that induce interferon production. *J Med Chem* **48**:3481-3491.
11. Gorudko IV, and Timoshenko AV (2001) Impact of MK-886 on H<sub>2</sub>O<sub>2</sub> generation by human neutrophils and cell degranulation. *Biochemistry (Mosc)* **66**:290-294.
12. Hengge UR, and Ruzicka T (2004) Topical immunomodulation in dermatology: potential of toll-like receptor agonists. *Dermatol Surg* **30**:1101-1112.

13. Kasper B, Brandt E, Bulfone-Paus S, and Petersen F (2004) Platelet factor 4 (PF-4)-induced neutrophil adhesion is controlled by src-kinases, whereas PF-4-mediated exocytosis requires the additional activation of p38 MAP kinase and phosphatidylinositol 3-kinase. *Blood* **103**:1602-1610.
14. Krajewska MM, and Anderson R (1993) An in vitro comparison of the effects of the prooxidative riminophenazines clofazimine and B669 on neutrophil phospholipase A2 activity and superoxide generation. *J Infect Dis* **167**:899-904.
15. Krjukova J, Holmqvist T, Danis AS, Akerman KE, and Kukkonen JP (2004) Phospholipase C activator m-3M3FBS affects Ca<sup>2+</sup> homeostasis independently of phospholipase C activation. *Br J Pharmacol* **143**:3-7.
16. Kuan YH, Lin RH, Lin HY, Huang LJ, Tsai CR, Tsao LT, Lin CN, Chang LC, and Wang JP (2006) Activation of phosphoinositide 3-kinase and Src family kinase is required for respiratory burst in rat neutrophils stimulated with artocarpol A. *Biochem Pharmacol* **71**:1735-1746.
17. Kuan YH, Lin RH, Tsao LT, Lin CN, and Wang JP (2005) Artocarpol A stimulation of superoxide anion generation in neutrophils involved the activation of PLC, PKC and p38 mitogen-activated PK signaling pathways. *Br J Pharmacol* **145**:460-468.
18. Llewellyn-Jones CG, and Stockley RA (1994) The effects of beta 2-agonists and methylxanthines on neutrophil function in vitro. *Eur Respir J* **7**:1460-1466.
19. Mathieu MC, Sawyer N, Greig G M, Hamel M, Kargman S, Ducharme Y, Lau C K, Friesen R W, O'Neill G P, Gervais F G and Therien A G (2005) The C3a Receptor Antagonist SB 290157 Has Agonist Activity. *Immunol Lett* **100**:139-145.
20. Mattsson L, Blomgren H, Holmgren B, and Jarstrand C (1983) Bestatin treatment for the correction of granulocyte dysfunction in patients with recurrent furunculosis. *Infection* **11**:205-207.
21. Miselis J, Siminiak T, and Wysocki H (1994) Evidence for stimulation of neutrophil degranulation by selected angiotensin converting enzyme inhibitors in vitro. *J Hum Hypertens* **8**:565-569.
22. Molnar J, Petri I, Berek I, Shoyama Y, and Nishioka I (1987) The effects of cannabinoids and cannabispino compounds on *Escherichia coli* adhesion to tissue culture cells and on leukocyte functions in vitro. *Acta Microbiol Hung* **34**:233-240.
23. Nanamori M, Cheng X, Mei J, Sang H, Xuan Y, Zhou C, Wang M W and Ye R D (2004) A Novel Nonpeptide Ligand for Formyl Peptide Receptor-Like 1. *Mol Pharmacol* **66**:1213-1222.
24. Oddera S, Silvestri M, Sacco O, Eftimiadi C, and Rossi GA (1993) Effect of pidotimod on phagocytosis and intracellular killing of *Staphylococcus aureus* by human circulating polymorphonuclear neutrophils and alveolar macrophages. *Drugs Exp Clin Res* **19**(Suppl):27-35.
25. Ono Y, Kunii O, Ohyatsu I, Tokumura Y, Miyashita T, Aoki M, Sugiyama H, Nishiya H, Miyashita H, and Goldstein E (1994) Comparative study of the effects of cefodizime and HBW

- 538 in potentiating the production of reactive oxygen species by human polymorphonuclear leukocytes. *Chemotherapy* **40**:404-411.
26. Richardson MD, Shankland GS, and Gray CA (1989) Effect of amorolfine (Ro 14-4767/002) on in vitro phagocytosis and intracellular killing of *Candida albicans* by human neutrophils. *Mycoses* **32**:245-249.
  27. Shiraishi A, Katayama T, Matsuda T, Itoh Y, and Haneishi T (1987) Effects of a new antibiotic, isohematinic acid, on the resistance of mice to experimental infections. *Microbiol Immunol* **31**:461-468.
  28. Siemion IZ, and Kluczyk A (1999) Tuftsin: on the 30-year anniversary of Victor Najjar's discovery. *Peptides* **20**:645-674.
  29. Sugahara K, Zhang J, Watanabe Y, Sagara Y, and Kodama H (1997) Effect of protein kinase inhibitors on the superoxide generation and tyrosyl phosphorylation of prolylproline-primed human neutrophils. *Clin Biochem* **30**:75-78.
  30. Suzuki Y, and Furuta H (1988) Stimulation of guinea pig neutrophil superoxide anion-producing system with thymol. *Inflammation* **12**:575-584.
  31. Vago T, Baldi G, Colombo D, Barbareschi M, Norbiato G, Dallegri F, and Bevilacqua M (1994) Effects of naftifine and terbinafine, two allylamine antifungal drugs, on selected functions of human polymorphonuclear leukocytes. *Antimicrob Agents Chemother* **38**:2605-2611.
  32. van Rensburg AJ, Theron AJ, and Anderson R (1991) Comparison of the pro-oxidative interactions of flunoxapofen and benoxapofen with human polymorphonuclear leucocytes in vitro. *Agents Actions* **33**:292-299.
  33. Wang BS, Lumanglas AL, Ruzsala-Mallon VM, and Durr FE (1985) Induction of tumor-inhibitory macrophages with a novel synthetic immunomodulator, 3,6-bis(2-piperidinoethoxy)acridine trihydrochloride (CL 246,738). *J Immunol* **135**:679-683.
  34. Wang JP, Hsu MF, Ko HH, and Lin CN (2004) Stimulation of cellular free Ca<sup>2+</sup> elevation and inhibition of store-operated Ca<sup>2+</sup> entry by kazinol B in neutrophils. *Naunyn Schmiedebergs Arch Pharmacol* **370**:500-509.
  35. Wang JP, Tsao LT, Raung SL, and Lin CN (1998) The signal transduction mechanism involved in kazinol B-stimulated superoxide anion generation in rat neutrophils. *Br J Pharmacol* **125**:517-525.
  36. Watanabe Y, Sagara Y, Sugahara K, and Kodama H (1994) Iminodipeptides containing proline with C-terminal and N-terminal residues prime the stimulation of human neutrophil superoxide generation by fMLP. *Biochem Biophys Res Commun* **205**:758-764.
  37. Zeis BM, Savage J, O'Sullivan JF, and Anderson R (1990) The influence of structural modifications of dihydrophenazines on arachidonic acid mobilization and superoxide generation by human neutrophils. *Lepr Rev* **61**:163-170.
